# Supplementary material
Source: PubMed Central journal article supplement (PMC4854793)
Supplement: NIHMS742326-supplement-Supplemental_Figures.pdf [file NIHMS742326-supplement-Supplemental_Figures.pdf]

# Supplementary figures

## Fig. S1

### A

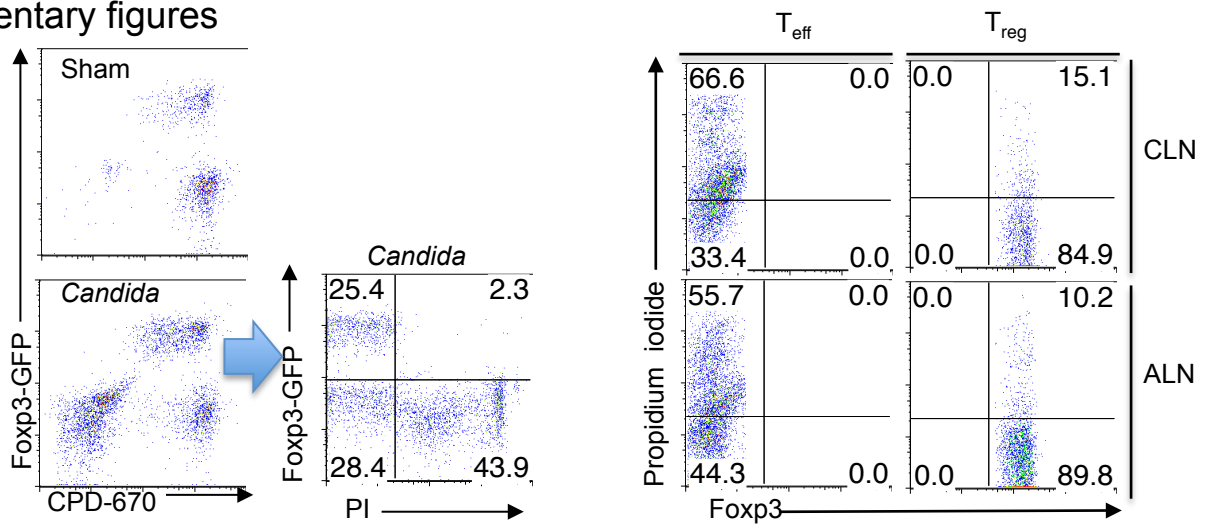

### B

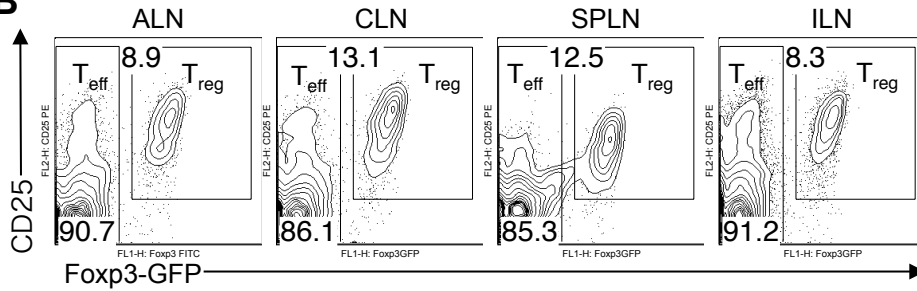

### C

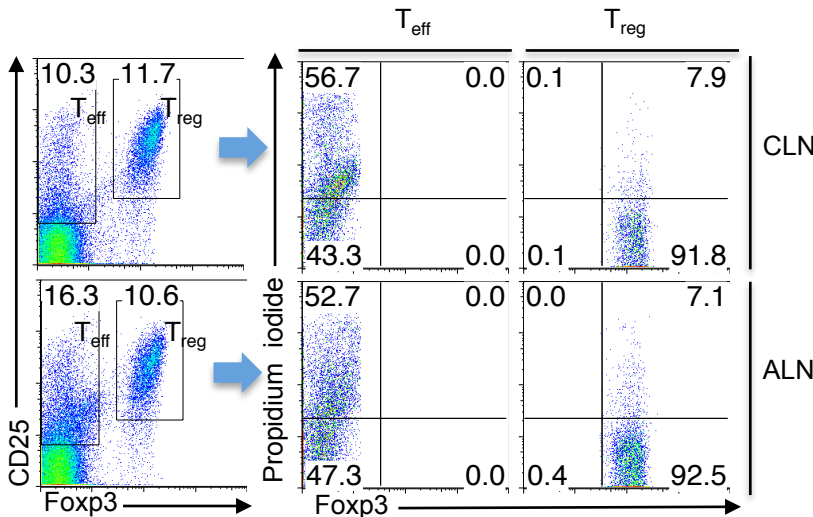

### D

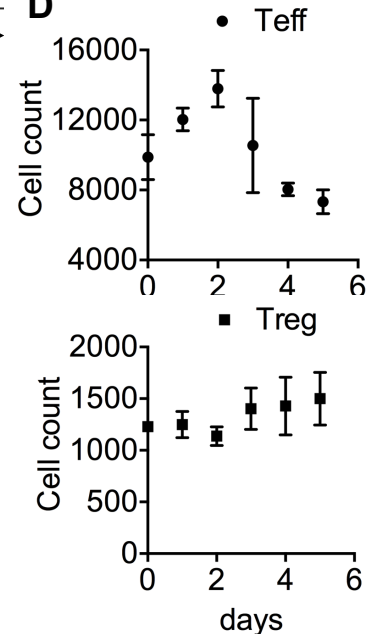

**Fig. S1. A. Foxp3<sup>+</sup> T<sub>regs</sub> do not show increased proliferation, but increased viability on d5 after OPC infection.** We adoptively transferred cell proliferation dye-670 (CPD-670) labeled CD4<sup>+</sup> cells isolated from CD45.2 Foxp3<sup>GFP</sup> reporter mice, into CD45.1 *Rag1*<sup>-/-</sup> mice four days before infection. We infected the mice, and assessed the proliferation by CPD-670 dilution, and viability by PI staining (gated on CD45.2+ CD4<sup>+</sup> cells) on d5 after OPC infection (**left panel**). Foxp3<sup>GFP</sup> reporter mice were infected as in Fig 1A, and viability was measured using PI staining on day 5 after primary infection (**right panel**). **B,C. Gating strategy to assess viability of CD4 cells in *C. albicans* infected Foxp3<sup>GFP</sup> reporter mice.** Flow cytometric contour plots of CD25 and Foxp3-GFP expression of the cells, isolated from the spleen (SPLN) or lymph nodes (LN) on day 1 after reinfection. Plots show CD4 gated cells, with further gating on Foxp3 - (T<sub>eff</sub>) or CD25+ Foxp3+ (T<sub>reg</sub>) cells in **B**, or CD25+Foxp3- (T<sub>eff</sub>) or CD25+Foxp3+ (T<sub>reg</sub>) cells. We refer to the non T<sub>reg</sub> cells activated by the infection *in vivo* as effector cells (T<sub>eff</sub>). **(C). D)** Mice were infected as in Fig 1A. At indicated time-points after primary infection, cells were harvested and stained for flow cytometry. To determine their absolute numbers, CD4<sup>+</sup>T cells were counted by adding 10000 fluoresbrite beads in 500ul of single-cell suspensions, and counting 5000 fluoresbrite beads using flow cytometry.

Fig. S2

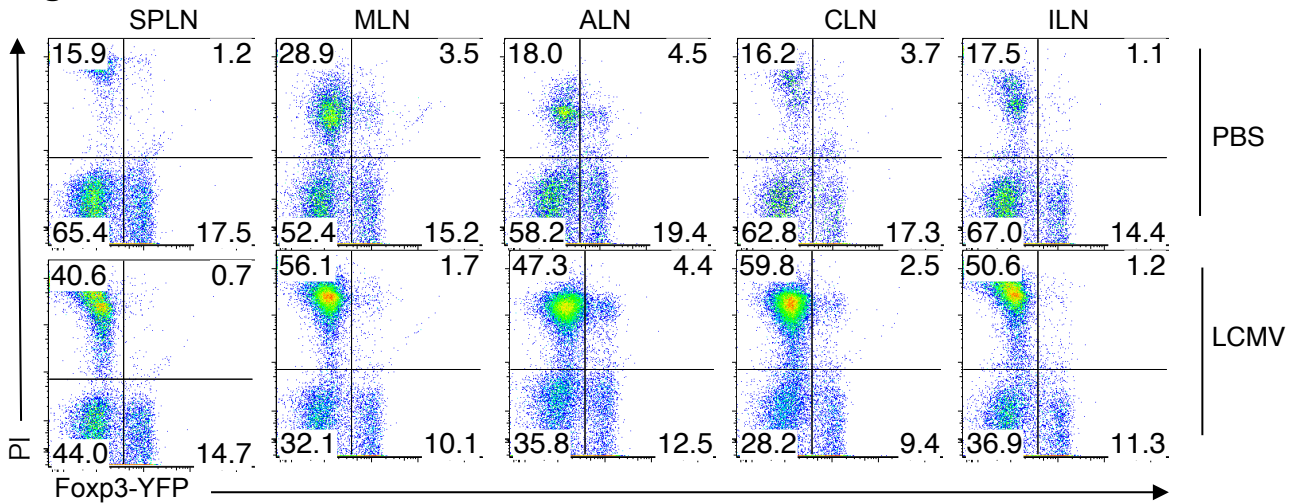

**Fig. S2.  $T_{\text{regs}}$  show increased viability during chronic LCMV (clone 13) infection in mice.** Foxp3<sup>YFP</sup> mice ( $n = 3/\text{group}$ ) were infected with LCMV as described in methods. Cells from indicated lymphoid organs were isolated on day 22 after infection and apoptosis of YFP<sup>+</sup>  $T_{\text{regs}}$  and YFP<sup>-</sup> effector cells was assessed using PI staining. Flow cytometric contour plots of PI staining (y-axis) and Foxp3-YFP (x-axis) expression of the cells isolated from the spleen (SPLN), mesenteric lymph nodes (MLN), ALN, CLN and ILN (all gated on CD4<sup>+</sup> cells). Data are representative of the results from two experiments each with viability measured at 3 different time-points.

Fig. S3

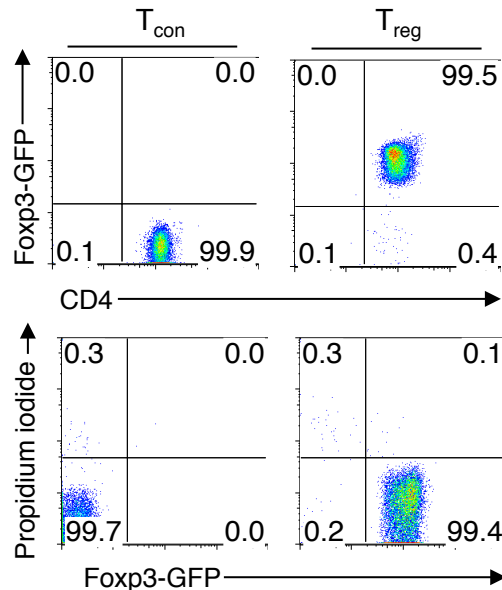

**Fig.S3. *Ex vivo* sorted  $T_{\text{cons}}$  and  $T_{\text{regs}}$ .** Flow cytometric dot plots of CD4 and Foxp3GFP expression (upper panel), and Foxp3GFP expression and propidium iodide (PI) staining (lower panel) of mouse  $T_{\text{cons}}$  (left) and mouse  $T_{\text{regs}}$  (right), enriched using magnetic isolation and further purified by FACS.

**Fig. S4**

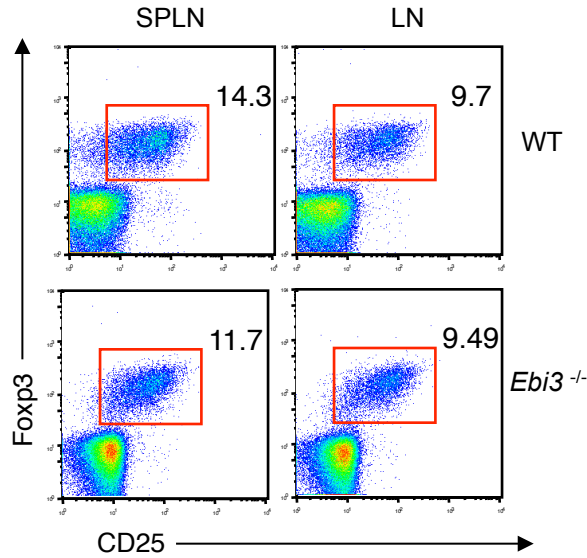

**Fig.S4. T<sub>reg</sub> frequency in WT and *Ebi3*<sup>-/-</sup> mice *ex vivo*.** Flow cytometric dot plots of CD25 and Foxp3 expression of WT mice (upper panel), and *Ebi3*<sup>-/-</sup> mice (lower panel). Plots show CD4 gated cells.

**Fig. S5**

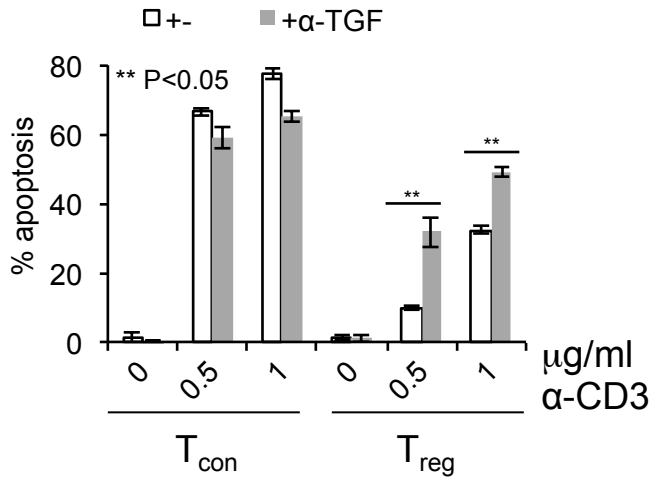

**Fig.S5. Pre-blocking TGF-β partially abrogates RICD resistance in T<sub>regs</sub>.** Percentage apoptosis of mouse T<sub>cons</sub> and T<sub>regs</sub> (right), which were restimulated under RICD conditions for 18 hours in the presence or absence of TGF-β blocking antibody (clone 1d11). We pre-blocked TGF-β by adding 50 μg/ml of anti-TGF-β antibody both during primary stimulation and RICD induction.

**Fig. S6**

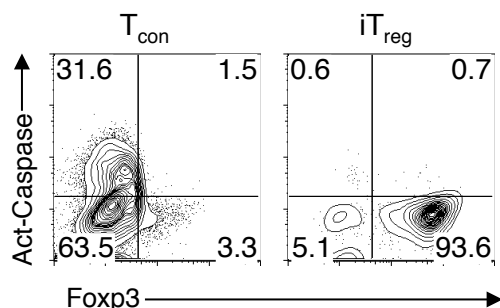

**Fig.S6. Activated Caspase-9 staining in  $T_{cons}$  and  $iT_{regs}$ .** Flow cytometric contour plots showing Foxp3 and active caspase-9 expression of mouse  $T_{cons}$  (left) and mouse  $iT_{regs}$  (right), which were restimulated under RICD conditions for 8 hours.

**Fig. S7**

**A**

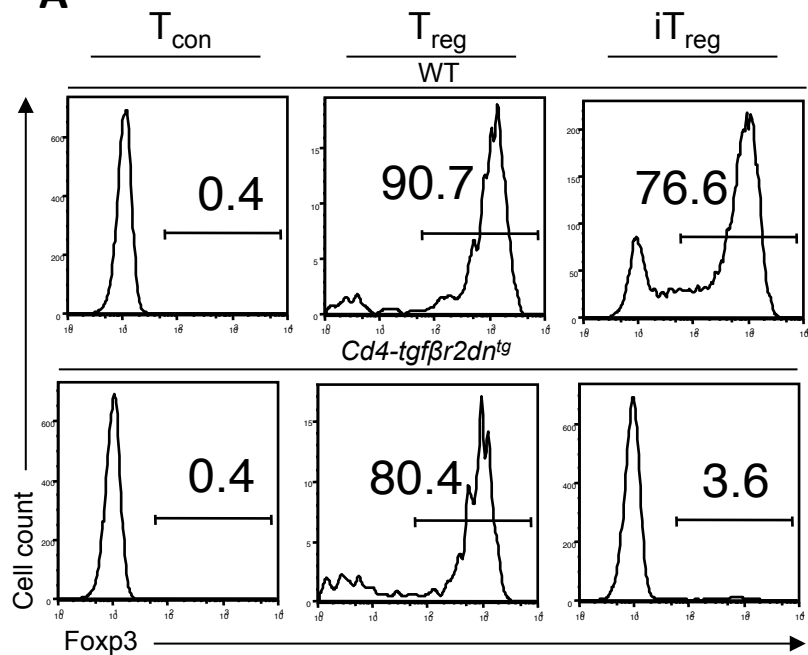

**B**

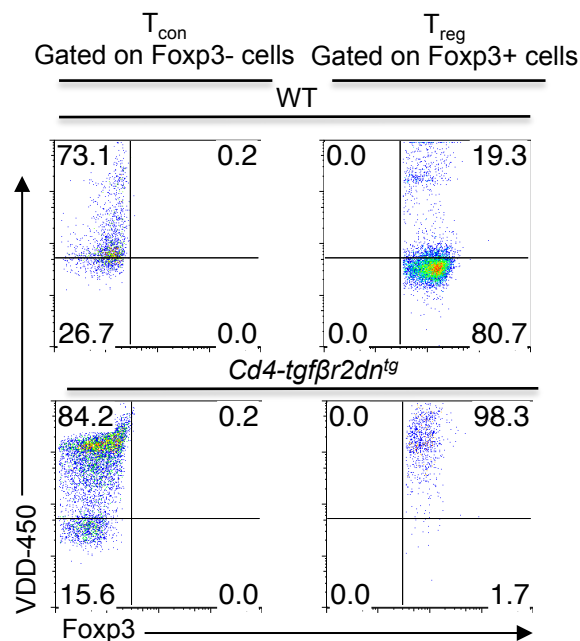

**Fig.S7. Fopx3 expression in  $T_{cons}$ ,  $T_{regs}$  and  $iT_{regs}$ .** **A)** Flow cytometric histogram plots showing Fopx3 expression of  $T_{cons}$  (left),  $T_{regs}$  (middle) and  $iT_{regs}$  (right) from WT (above) or  $Cd4-tgfb2dn^{tg}$  (below) mice, which were stimulated for 4 days, and before restimulation under RICD conditions. **B)** Cells were stimulated and restimulated as in A. Viability of the cells from WT (above) or  $Cd4-tgfb2dn^{tg}$  (below) mice, as measured by viability dye 450 (VDD 450) gating on Fopx3<sup>+</sup> (intracellularly stained) cells.
